# Supplementary material for: Canagliflozin for Primary and Secondary Prevention of Cardiovascular Events: Results From the CANVAS Program (Canagliflozin Cardiovascular Assessment Study)
Source: PubMed Central journal article supplement — Circulation. 2018 Jan 22;137(4):323–34. doi: 10.1161/CIRCULATIONAHA.117.032038 (PMC5777572; doi:10.1161/circulationaha.117.032038), 2018-01-22
Supplement: cir-137-323-s001.pdf [file cir-137-323-s001.pdf]

## **SUPPLEMENTAL MATERIAL**

### **Supplementary Appendix 1. CANVAS Program committees**

#### **Steering Committee**

David R. Matthews (Co-chair), Bruce Neal (Co-chair), Greg Fulcher, Kenneth W. Mahaffey,  
Vlado Perkovic, Mehul Desai (Sponsor), Dick de Zeeuw

#### **Independent Data Monitoring Committee**

Philip Home (Chair), Jeffrey L. Anderson, Ian W. Campbell, John Lachin (withdrew in September 2015),  
Daniel Scharfstein, Scott D. Solomon, Robert G. Uzzo

#### **Cardiovascular Adjudication Committee**

Greg Fulcher (Chair), John Amerena, Clara Chow, Gemma Figtree, John French, Graham Hillis, Mark A.  
Hlatky, Bronwyn Jenkins, Nicholas J. Leeper, Richard Lindley, Barry McGrath, Alison Street, John Watson

#### **Renal Adjudication Committee**

Greg Fulcher (Chair), Shahnaz Shahinfar, Tara Chang, Arjun D. Sinha, Phyllis August

#### **Safety Adjudication**

Fracture Adjudication: Bioclinica

Diabetic Ketoacidosis Adjudication: Baim Institute for Clinical Research

Pancreatitis Adjudication Committee: Adam Cheifetz (Chair), Sunil Sheth, Joseph Feuerstein
